# Supplementary material
Source: publisher figshare collection journal article supplement (https://acs.figshare.com/ndownloader/files/18678998)
Supplement: Supplementary file 1 [file 18678998]

# Supporting Information

## Cs<sub>2</sub>Cd(C<sub>2</sub>H)<sub>2</sub>(C<sub>2</sub>): A Crystalline Acetylide with Bridging C<sub>2</sub> Units

Melanie Werker<sup>†</sup>, Uwe Ruschewitz<sup>\*,†</sup>

<sup>†</sup> Department of Chemistry, University of Cologne, Greinstraße 6, D-50939 Cologne, Germany

E-mail address: uwe.ruschewitz@uni-koeln.de

Table S1: Fractional atomic coordinates and isotropic displacement parameters of Cs<sub>2</sub>Cd(C<sub>2</sub>H)<sub>2</sub>(C<sub>2</sub>).

Figure S1: Synchrotron powder diffraction pattern of Cs<sub>2</sub>Cd(C<sub>2</sub>H)<sub>4</sub>.

Figure S2: XRPD pattern of Cs<sub>2</sub>Cd(C<sub>2</sub>H)<sub>2</sub>(C<sub>2</sub>) synthesized under ammonothermal conditions.

Figure S3: Synchrotron powder diffraction patterns of different samples of Cs<sub>2</sub>Cd(C<sub>2</sub>H)<sub>2</sub>(C<sub>2</sub>).

**Table S1.** Fractional atomic coordinates and isotropic displacement parameters (Å<sup>2</sup>) of Cs<sub>2</sub>Cd(C<sub>2</sub>H)<sub>2</sub>(C<sub>2</sub>).

| a)  | Wyckoff letter | <i>x</i>   | <i>y</i>  | <i>z</i> | <i>U</i> <sub>iso</sub> |
|-----|----------------|------------|-----------|----------|-------------------------|
| Cs1 | 4 <i>c</i>     | 0          | 0.2392(3) | ¼        | 0.049(2)                |
| Cs2 | 4 <i>a</i>     | 0          | 0         | 0        | 0.049(2)                |
| Cd  | 4 <i>c</i>     | 0          | 0.5182(3) | ¼        | 0.032(2)                |
| C1  | 8 <i>f</i>     | ½          | 0.178(2)  | 0.058(2) | 0.015(7)                |
| C2  | 8 <i>f</i>     | ½          | 0.114(2)  | 0.117(2) | 0.015(7)                |
| C3  | 8 <i>g</i>     | 0.38287(4) | 0.441(2)  | ¼        | 0.015(7)                |
| H1  | 8 <i>f</i>     | ½          | 0.226(7)  | 0.012(8) | 0.015(7)                |

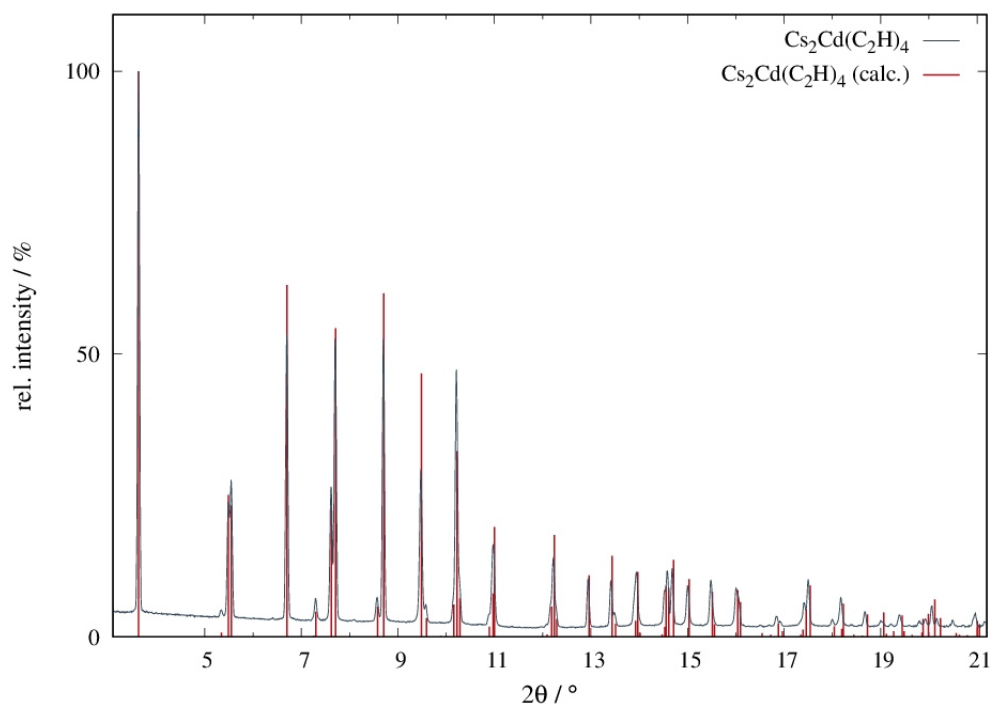

**Figure S1.** Synchrotron powder diffraction pattern of  $\text{Cs}_2\text{Cd}(\text{C}_2\text{H})_4$  (dark blue curve; DELTA beamline BL9,  $\lambda = 0.47674 \text{ \AA}$ , capillary:  $\varnothing = 0.5 \text{ mm}$ ). For comparison the theoretical pattern calculated from the structure data given in the literature (*Z. Anorg. Allg. Chem.* **2004**, 630, 337) is shown (red line diagram).

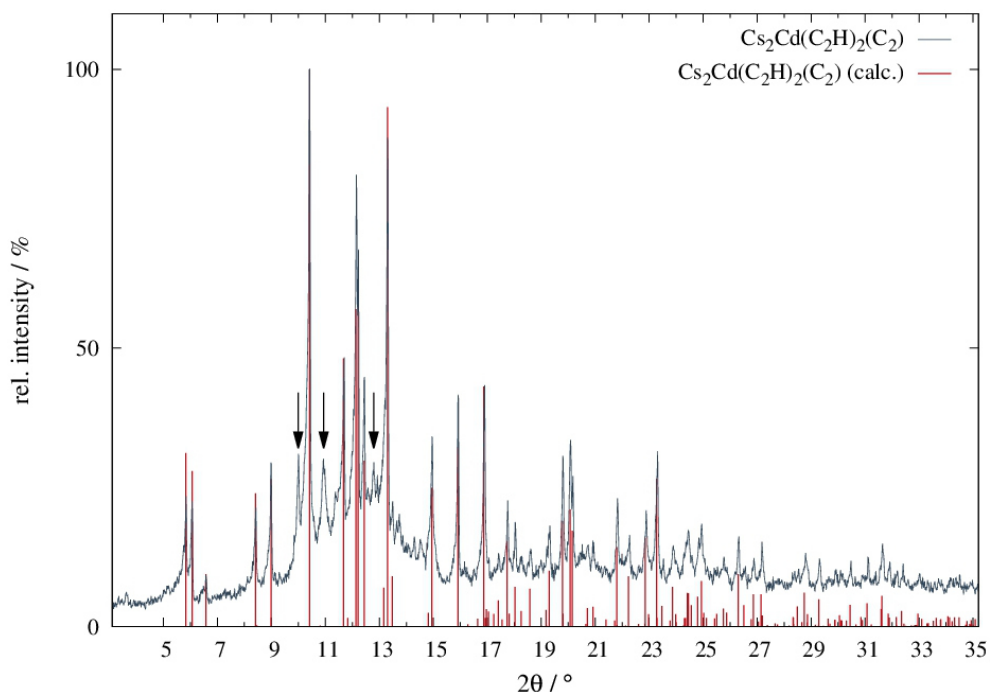

**Figure S2.** XRPD pattern of  $\text{Cs}_2\text{Cd}(\text{C}_2\text{H})_2(\text{C}_2)$  synthesized under ammonothermal conditions (dark blue curve, Stoe Stadi P,  $\text{Mo-K}\alpha_1$ , capillary:  $\varnothing = 0.3 \text{ mm}$ ). For comparison the theoretical pattern calculated from its crystal structure is added as a red line diagram. The most intense impurity reflections are indicated with an arrow.

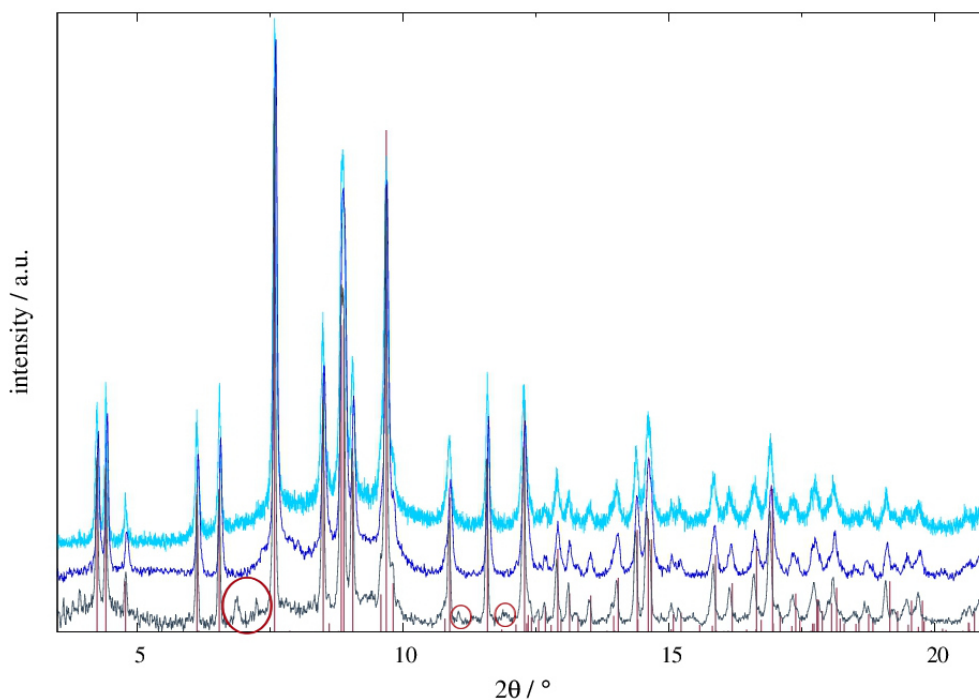

**Figure S3.** Comparison of different samples of  $\text{Cs}_2\text{Cd}(\text{C}_2\text{H})_2(\text{C}_2)$  measured with synchrotron radiation: ESRF, SNBL beamline (light blue curve); DELTA, BL9 beamline (grey and dark blue curve). All data were converted to the same wavelength ( $\lambda = 0.51655 \text{ \AA}$ ). A theoretical pattern calculated from the crystal structure of  $\text{Cs}_2\text{Cd}(\text{C}_2\text{H})_2(\text{C}_2)$  is added as a red line diagram. Some additional reflections in the “DELTA sample” are indicated with red circles.
